# Supplementary material for: Development and validation of an infant facial skin assessment tool: a prospective observational study
Source: Springer Nature journal article supplement (doi:10.1186/s12887-022-03691-7), 2022-10-25
Supplement: MOESM1 [file 23639452]

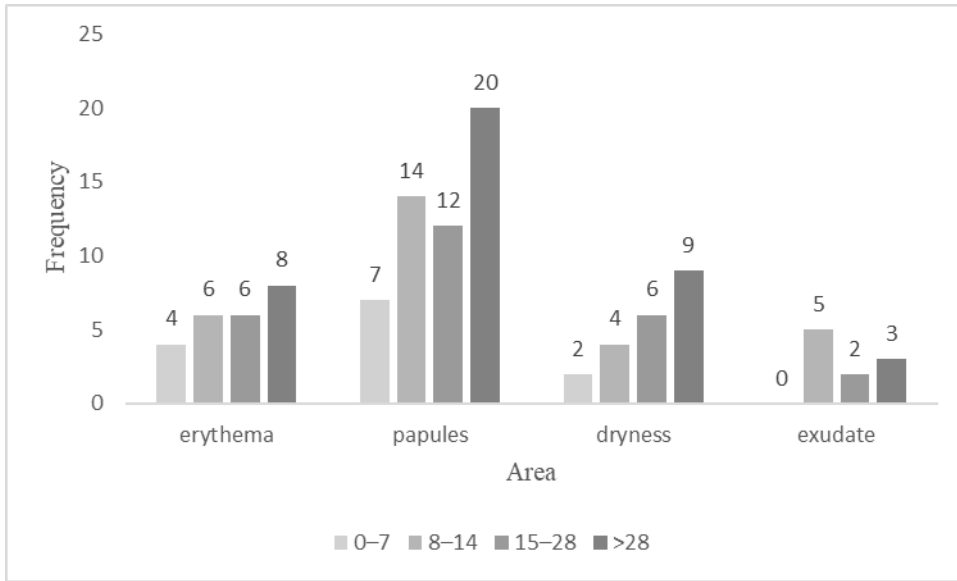

Fig S1: Relationship between number of infants who had any of skin problems and the cure period (days).

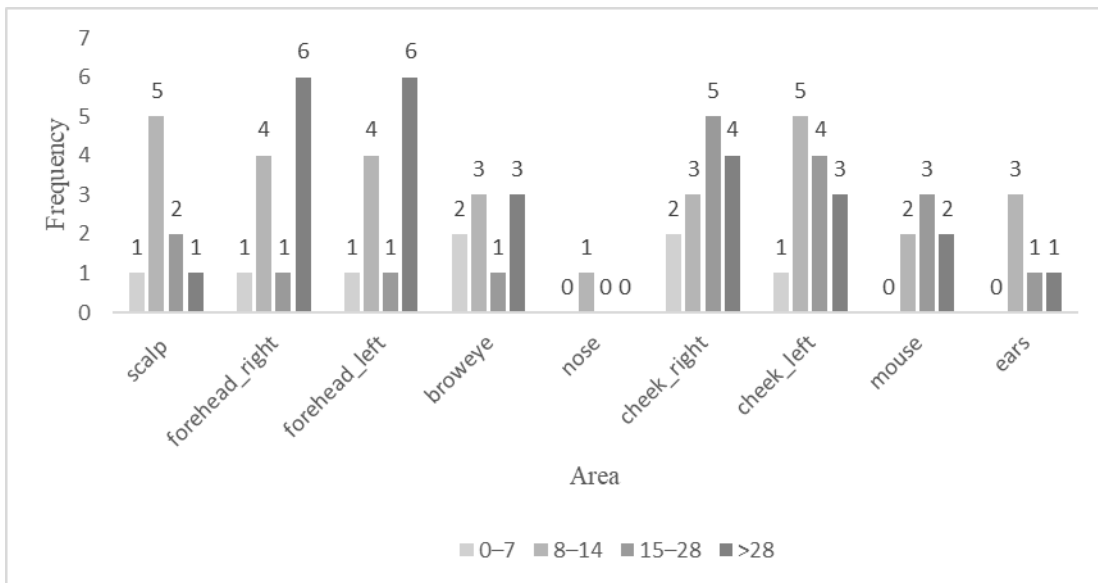

Fig S2: Relationship between number of infants who had erythema and the cure period (days). (n=24)

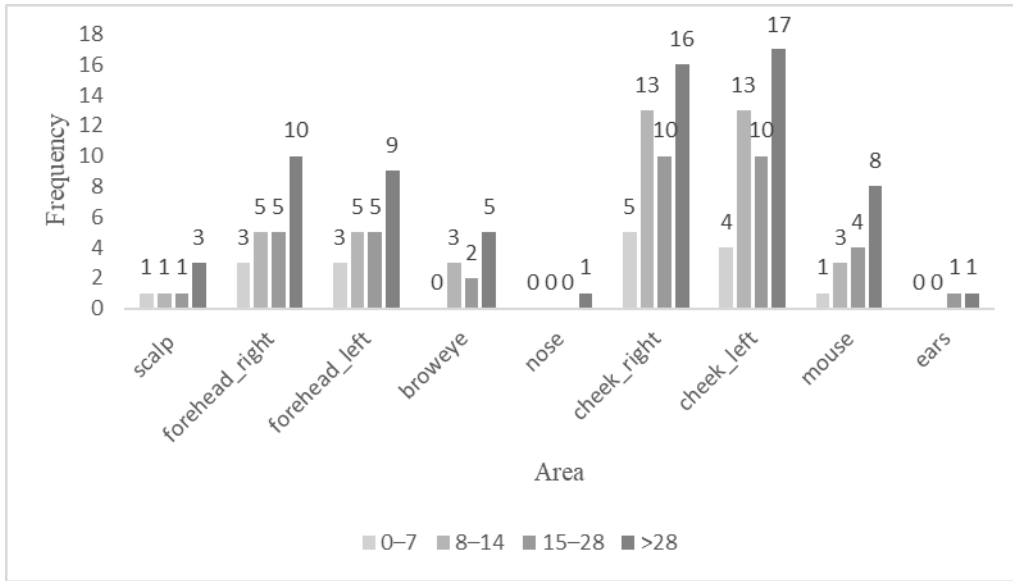

Fig S3: Relationship between number of infants who had papules and the cure period (days). (n=53)

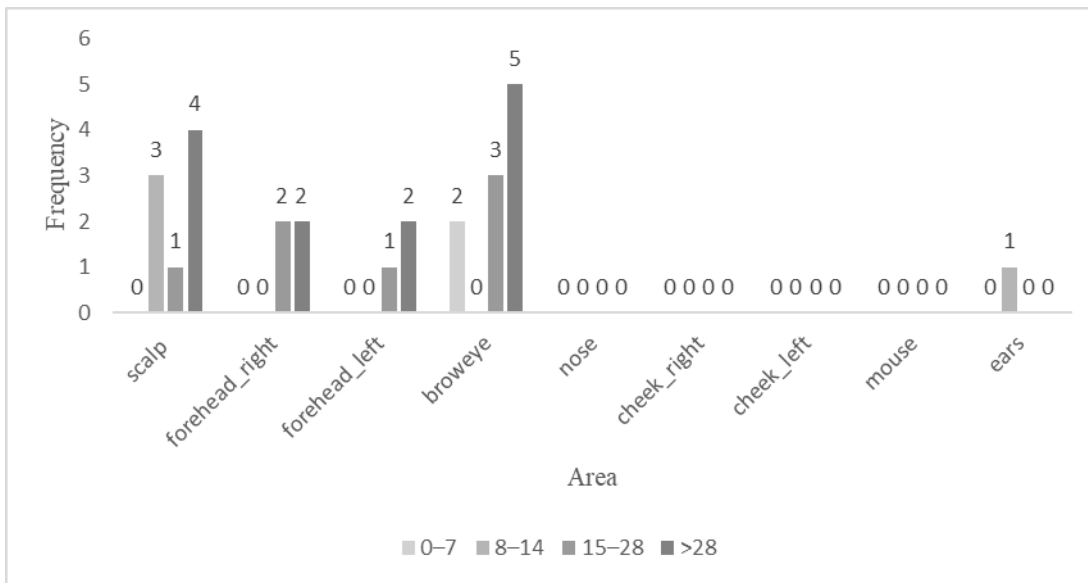

Fig S4: Relationship between number of infants who had dryness and the cure period (days). (n=21)

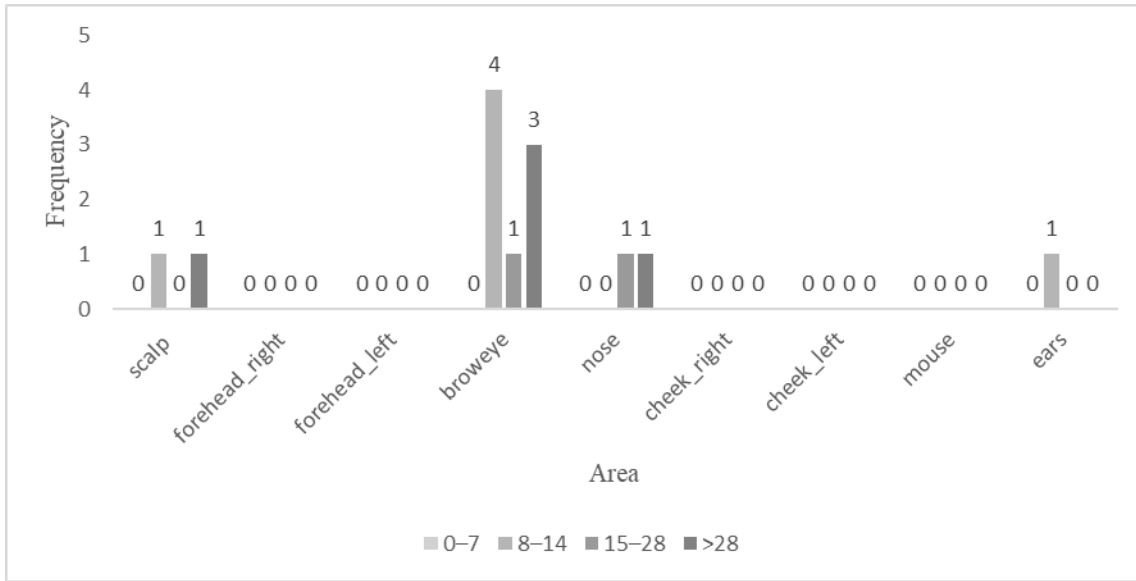

Fig S5: Relationship between number of infants who had exudate and the cure period (days). (n=10)
